# Supplementary figures and images for: A study of graphenes prepared by different methods: characterization, properties and solubilization
Source: Royal Society of Chemistry journal article supplement (doi:10.1039/b716536f), 2008-01-01

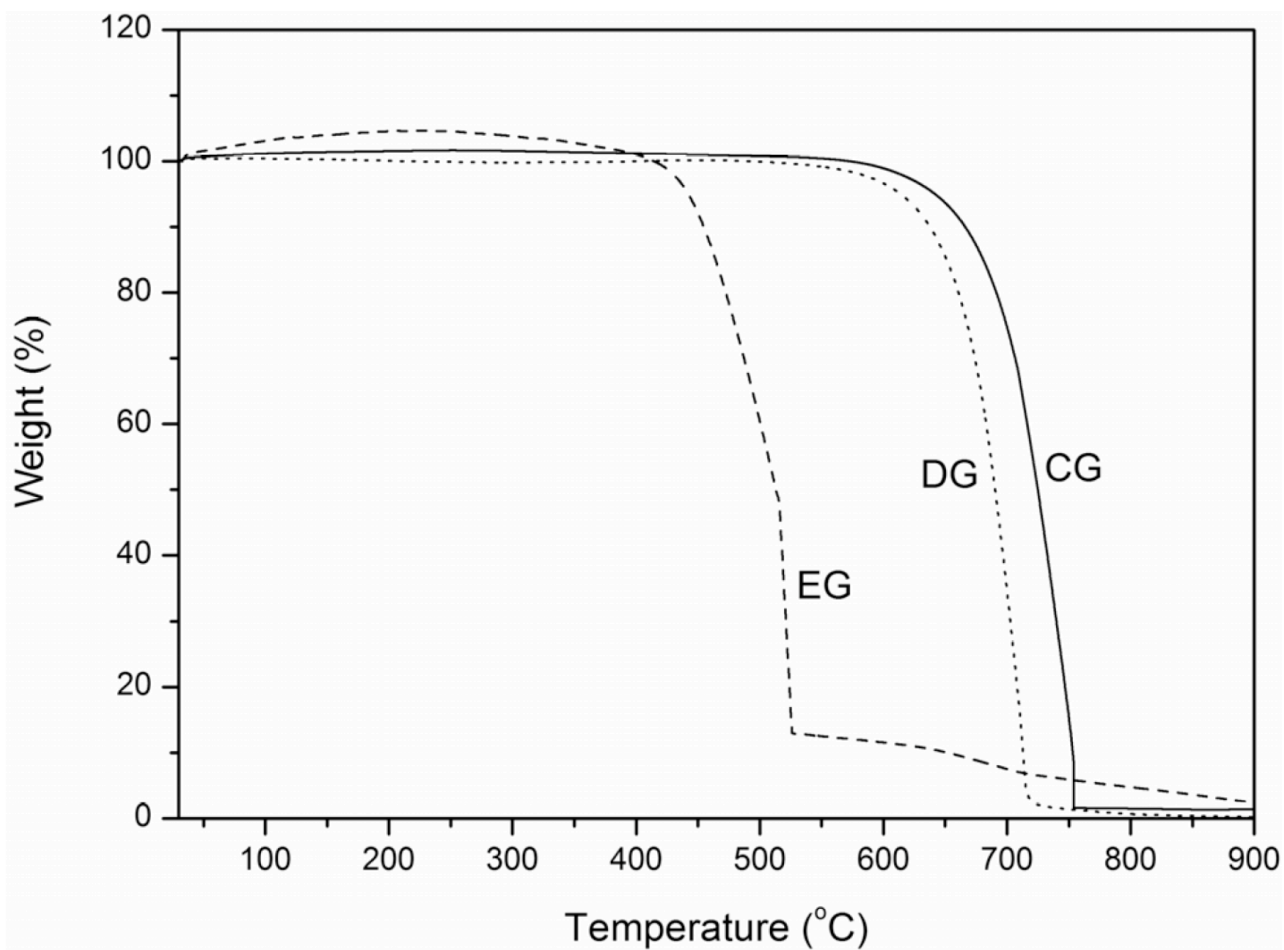

Thermogravimetric plot of oxidation of different graphene samples

Supplement: b716536f.pdf [file b716536f.pdf]
